# Supplementary material for: Umeclidinium/vilanterol versus fluticasone propionate/salmeterol in COPD: a randomised trial
Source: PubMed Central journal article supplement (PMC4545560; doi:10.1186/s12890-015-0092-1), 2015-08-19

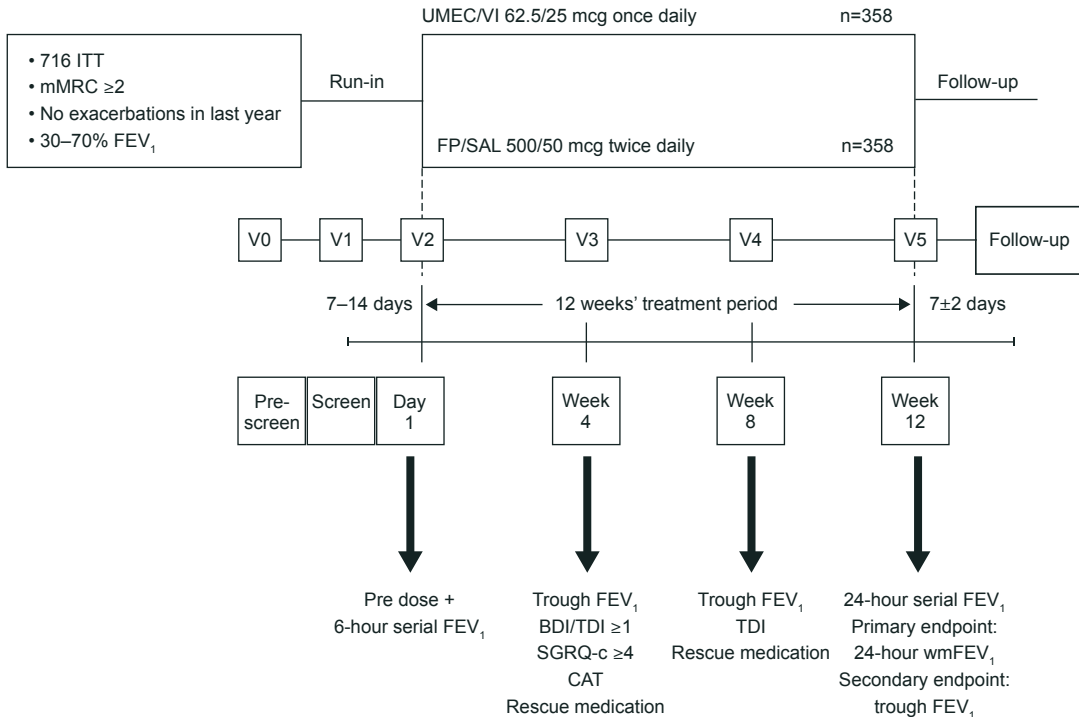

Supplement: 12890_2015_92_MOESM2_ESM.pdf [file 12890_2015_92_MOESM2_ESM.pdf]
